# Supplementary material
Source: PubMed Central journal article supplement (PMC4498202)
Supplement: supp_tpc.15.00068_TPC2015-00068-RAR1_Supplemental_Data_FINAL.pdf [file supp_tpc.15.00068_TPC2015-00068-RAR1_Supplemental_Data_FINAL.pdf]

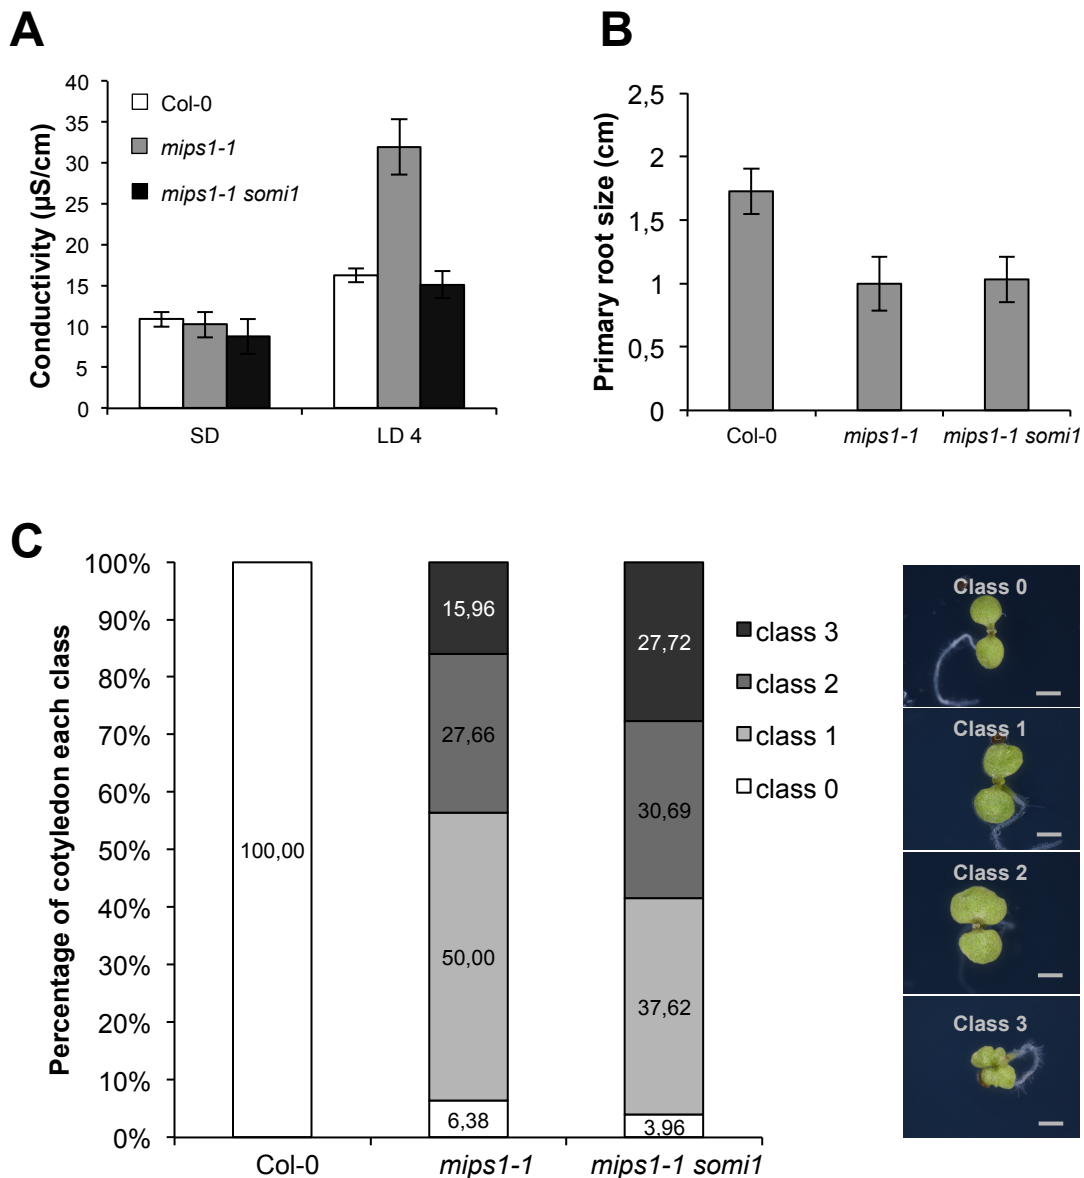

**Figure S1. Phenotypic analyses of the *mips1-1 hxx1-1* suppressor mutant.** A, Ion leakage assays, with means and standard deviations calculated from six leaf discs per treatment with three biological replicates grown in SD conditions and transferred to LD conditions for 4 days (LD 4). B, Primary root lengths of the indicated genotypes. C, Relative proportion of each cotyledon class in the indicated genotypes. Bar = 1 cm.

**A**

*A. thaliana* FPVKQTSLSGSLIKHTKGF SIEEAVGQDVV GALNKALERVG-LDMRIAALYNDTVGTLAGGRY-YNPDVVAAYILGTGTNAA YVERATAIPKWH-GL--  
*N. benthamiana* FPMVQTSINSGTIMRHTKGF SIDDVAVGQDVV GELTKAMKRKG-VDMRV SALYNDTVGTLAGGKY-THNDVAVAVILGTGTNAA YVERVQAI PKWH-GP--  
*V. vinifera* FVPRQSSIASGSLIKHTKGF SIEDVAVGQDVV GELTKAMERIG-LDMRV SALYNDTVGTLAGGRY-YQDQVVAAYILGTGTNAA YVERAQSI PKWH-GL--  
*P. patens* FVPRQTSVKSGIYIHTKGF KYDDAVGKDIYKQFQDAISRSN-HQIMISALYNDTVGTLAGGRFNFDEETMIGCIIGTGTNACYVERADAVHKWD-EP--  
*O. satyva* FVPVHQTSIASGTLIRHTKAFAYDDAIGEDVVAALQAAMSERG-LDMRV SALINDTVGTLAAGSY-YQEDVVAAYILGTGTNAA YVEDATAIAK LHP SQ--  
*S. cerevisiae* YPASQNKINEGILQRHTKGF DIPNVEGHDV VPLLQNEISKRE-LPIEIV ALINDTVGTLIASYY-TDPETKMGVIFGTGVNGAFYD VVSDIEKLEGK LAD  
*C. reinhardtii* FAVEQSGLAAGKLLDHTKGF KCSGVI GNDPVKLLTAALERAG-CPCRVLALLNDTVGVLAAQRY-LDHHTDVGVIIIGTGTNACYVEDAKLTKWRPPAG-  
*M. musculus* FPCRQSKIDEAVLITHTKRFKASGVEGADV KLLNKAIKKRGDYDANIYAVYNDTVGTHMTCGY-DDQQCEVGLIIGTGTNACYMEELRHIDLVE-----  
*H. sapiens* FPCQQSKIDEAIIITHTKRFKASGVEGADV KLLNKAIKKRGDYDANIYAVYNDTVGTHMTCGY-DDQQCEVGLIIGTGTNACYMEELRHIDLVE-----  
 %pv.Q.si.sg.li.HTKGF.....a.G.DvV...l...a...r.g..d.r!.AlvNDT!Gt\$a.g.%..d.....gvI.GTGtNaa%v#.a..i.kw.....

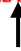**B**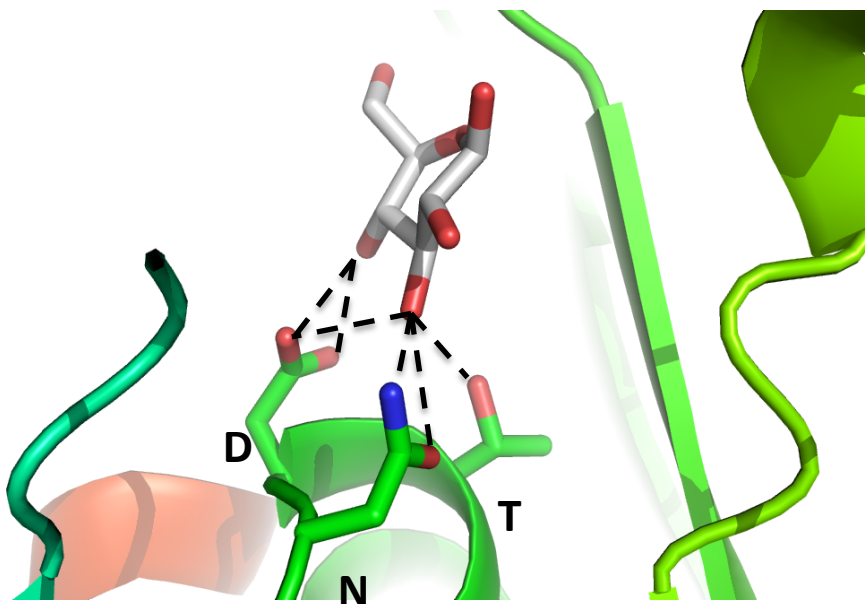

### Figure S2. Position of threonine 231 in HXK1 primary protein sequences

A - Sequence analysis. Protein sequences of the indicated species were collected from public resources ([www.ncbi.nlm.nih.gov](http://www.ncbi.nlm.nih.gov)), and multi alignment was performed with the online software Multalin ([multalin.toulouse.inra.fr/multalin](http://multalin.toulouse.inra.fr/multalin)). The arrow indicates threonine 231.

B - Structure analysis. Close view of the active site of the glucose-bound form of the yeast hexokinase from *Kluyveromyces lactis* (Kuettner et al., 2010). The figure was prepared using the PyMOL Molecular Graphics System and the PDB entry 3O5B. The protein is shown as a cartoon colored by spectrum. The side chains of the three conserved residues N, D and T are highlighted in sticks colored by atom type, as the bound glucose. H-bonds between the three residues and glucose are shown as black dashed lines.

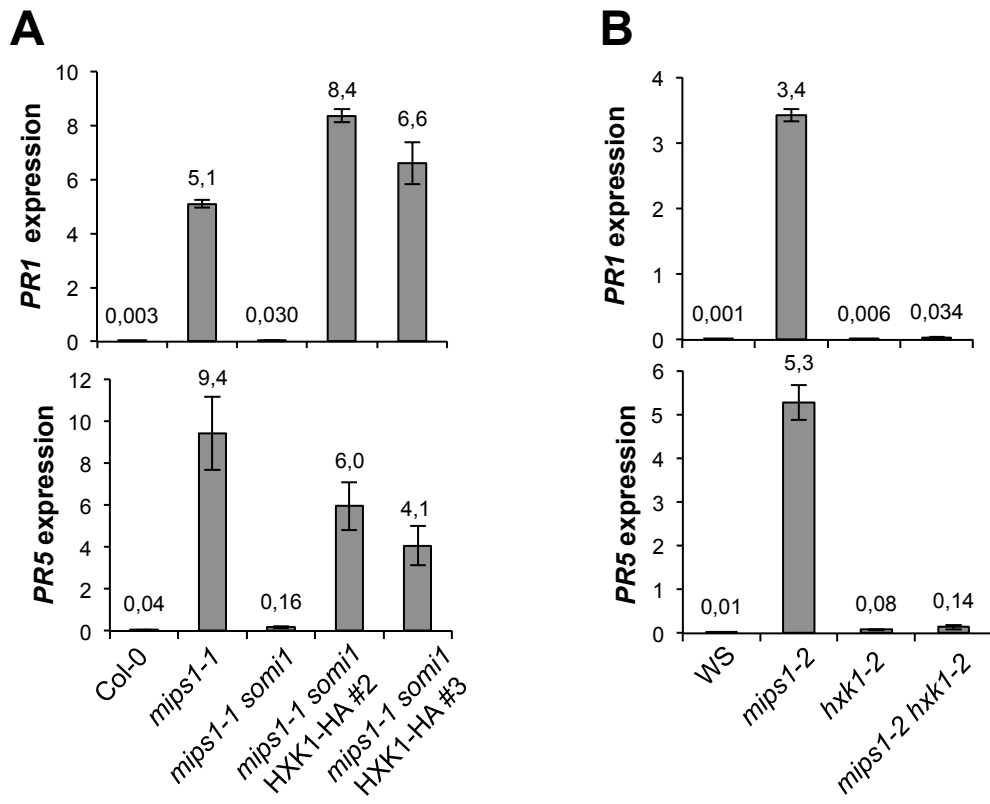

### Figure S3. Relative expression of *PR1* and *PR5*

A and B, RT-qPCR analysis of *PR1* and *PR5* expression in the rosette leaves of plants of the indicated genotypes, 4 days after transfer to LD conditions. Transcript abundance is expressed relative to *UBQ10* transcript abundance. Means and standard deviations were calculated from two biological replicates.

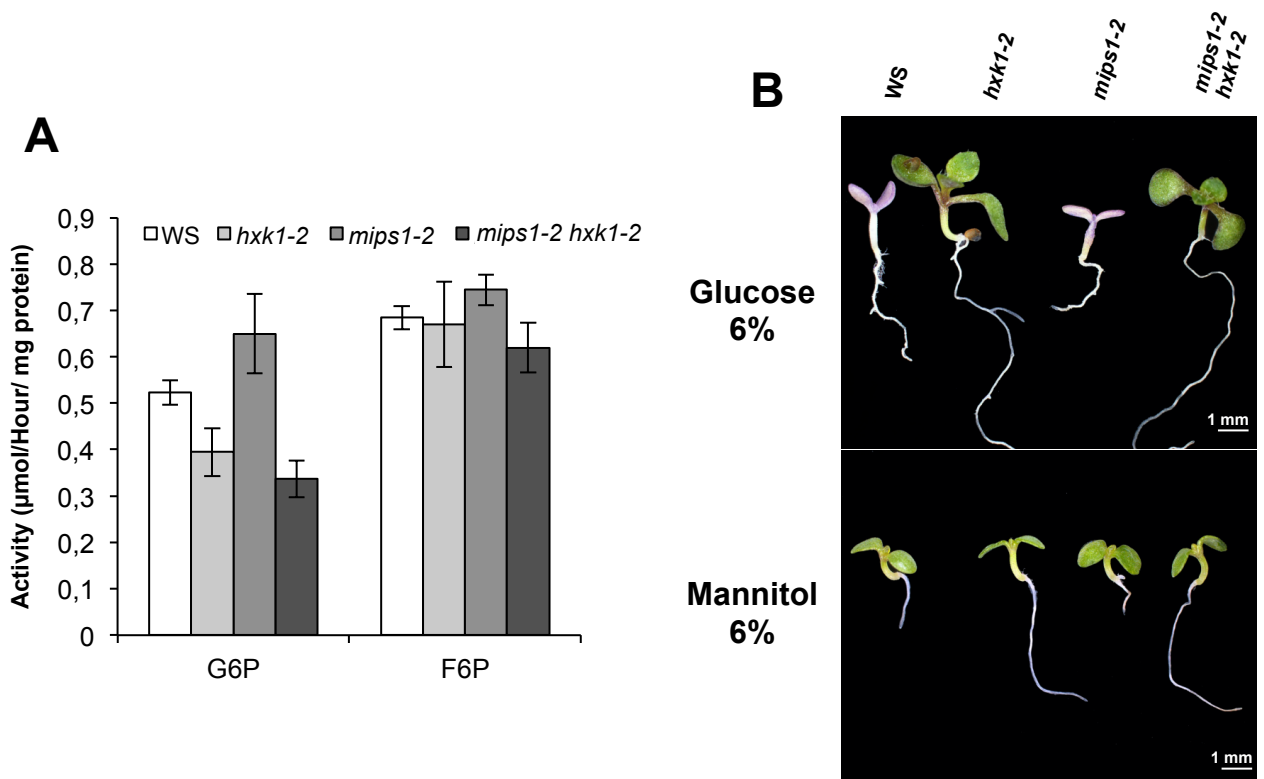

**Figure S4. HXK1 metabolic and signalling functions in the mutants *hxk1-2* and *mips1-2 hxk1-2***

A, Glucokinase and fructokinase activity measurement in the indicated lines. G6P, glucose-6-phosphate; F6P, fructose-6-phosphate. Samples were harvested two days after transfer to LD conditions, and means and standard error were calculated from four biological replicates. B, Glucose sensitivity assay. Plants were grown on a 6% glucose (Glc) or mannitol (Man) MS medium, for 10 days.

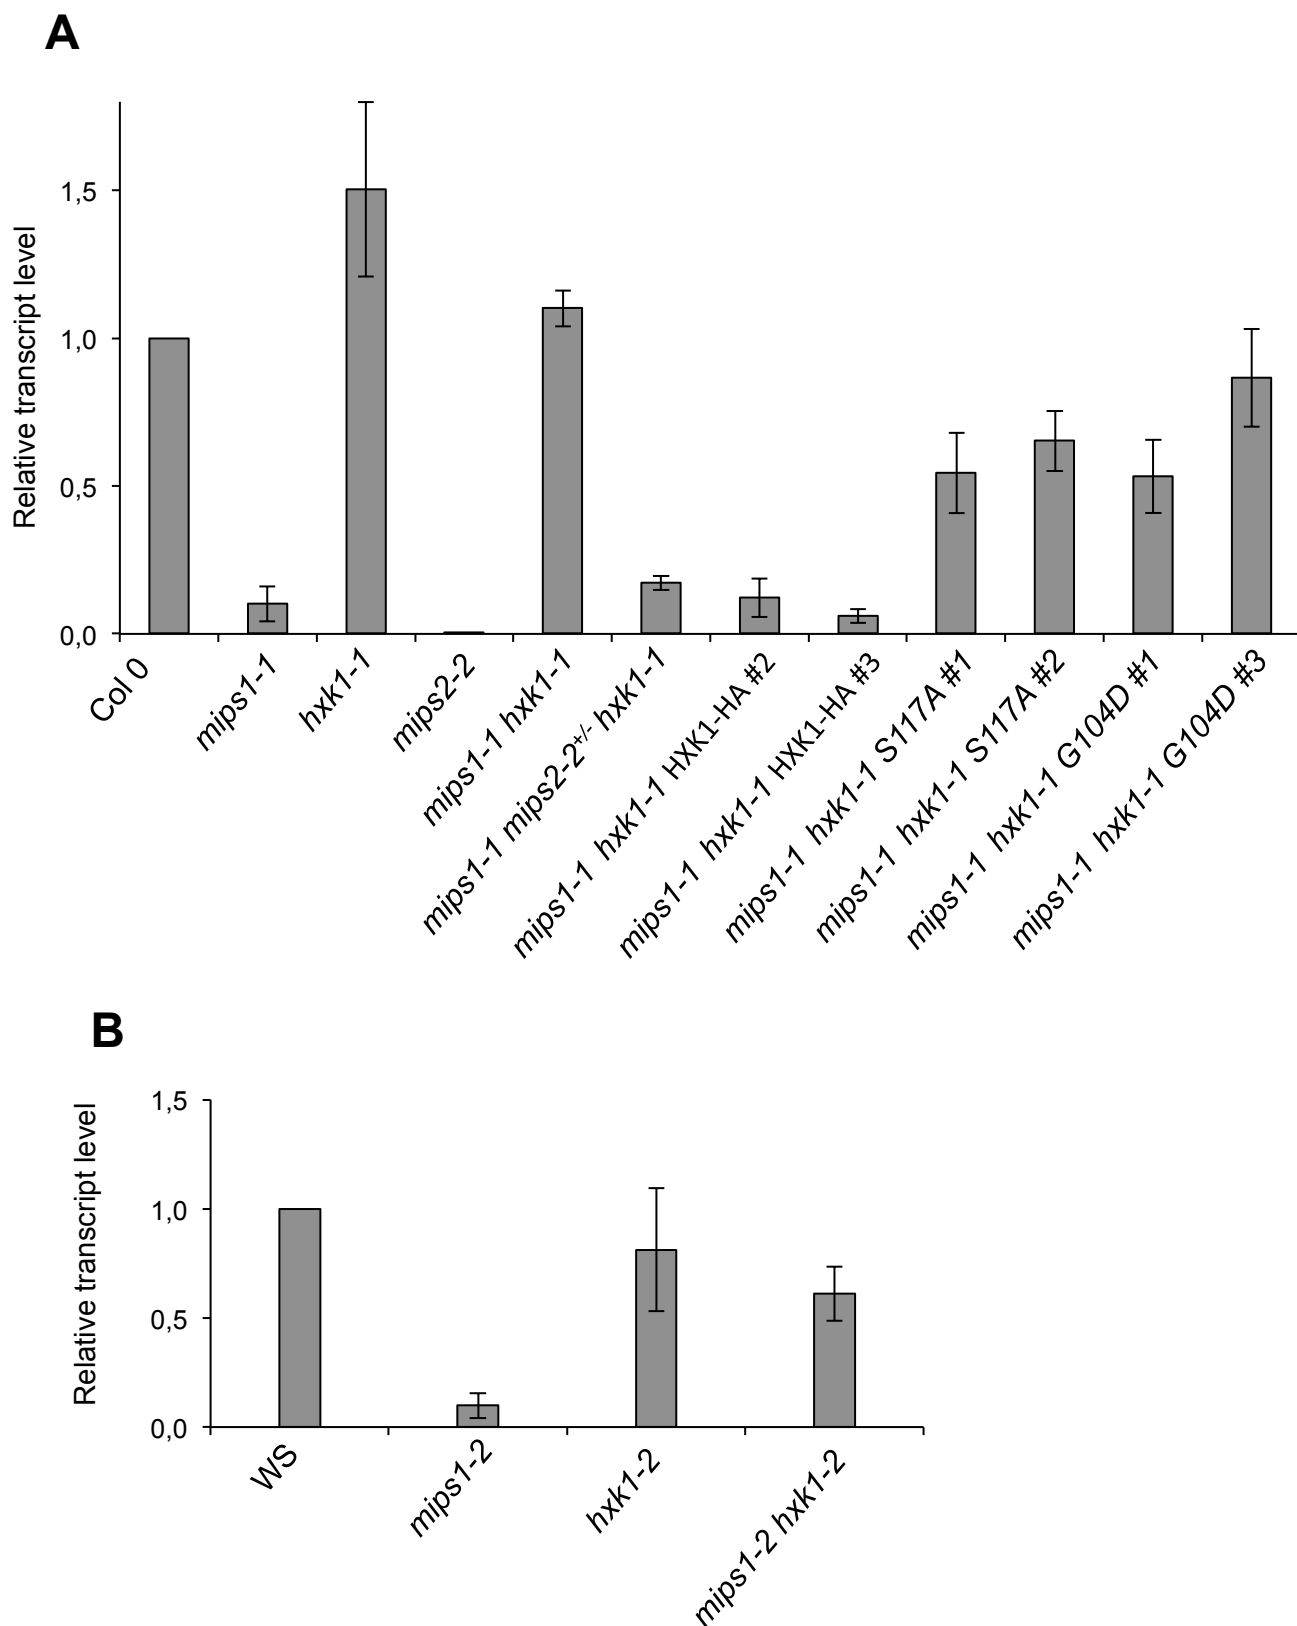

**Figure S5. Effect of *mips1*, *mips2*, *hck1* mutations and of complementation on *MIPS2* expression**

RT-qPCR analysis of *MIPS2* expression in rosette leaves from indicated genotypes in Col-0 (A) and WS (B) backgrounds, 4 days after transfer in LD conditions. Transcript abundance is expressed relative to *UBQ10* transcripts abundance. Means and standard deviations were calculated from two biological replicates.
